# Supplementary material for: Prognosis and Characterization of Microenvironment in Cervical Cancer Influenced by Fatty Acid Metabolism-Related Genes
Source: J Oncol. 2023 Mar 8;2023:6851036. doi: 10.1155/2023/6851036 (PMC10017219; doi:10.1155/2023/6851036)
Supplement: Supplementary Materials — Supplementary Table 1: fatty acid metabolism-related genes. Supplementary Table 2: the LASSO genes and their coefficient. Supplementary Table 3: the results of PH assumption. Supplementary Table 4: the significant genes in SVM model. Supplementary Table 5: the significant genes in univariate model. Supplementary Table 6: the intersection of significant genes in different models. Supplementary Table 7: the intersection of hub genes by “friends” analysis and “closeness” analysis. Supplementary Table 8: the transcription factors. Supplementary Table 9: the influence of infiltrating cells and risk score on survival by Cox regression. Supplementary Figure 1: construction of FAM-related clinicopathologic nomogram with risk score. Supplementary Figure 2: validation of nomogram with risk group. Supplementary Figure 3: results of PH assumption. Supplementary Figure 4: the expression levels of pivotal enzymes of FAM based on the risk groups. Supplementary Figure 5: functional enrichment according to GO and KEGG. Supplementary Figure 6: functional enrichment according to Msigdb and Reactome. Supplementary Figure 7: the cooccurrence of mutations and tumour mutation burden in CC patients. Supplementary Figure 8: the mutation pattern of most mutated genes in CC patients. Supplementary Figure 9: summary of transition and transversion in CC patients. Supplementary Figure 10: the mutation hotspots of oncogenic driver genes. Supplementary Figure 11: the distribution of mutated genes in oncogenic RTK-RAS pathway. Supplementary Figure 12: the distribution of mutated genes in oncogenic PI3K pathway. Supplementary Figure 13: the distribution of mutated genes in oncogenic NOTCH pathway. Supplementary Figure 14: comparison against known signatures and mutation hotspot of POLE and their influence on survival. Supplementary Figure 15: genome-wide distribution of chromatin amplification and deletion. Supplementary Figure 16: correlation between expressed neoantigen load and TMB. Supplementary [file 6851036.f1.zip]

Archive with 2 entries (2 files):
- supplementary figure 1-23 (1).pdf
- Supplementary Table 1-9 (1).docx
